# Supplementary material for: Stepwise stroke recognition through clinical information, vital signs, and initial labs (CIVIL): Electronic health record-based observational cohort study
Source: PubMed Central journal article supplement (PMC7159200; doi:10.1371/journal.pone.0231113), 2020-04-15
Supplement: pone.0231113.s003.pdf [file pone.0231113.s003.pdf]

**Supplementary figure 1. The Korean version of EMR based matrix for stroke suspicious patients. (Cubic S model)**

This model was made up 3 domains of time, body spatial, and symptoms: Sudden, Side, Symptoms.

FAST 지표 확인 - MMF001F6 (2016.02.01.19.10.00) 정보관리팀\_최경희 / 손형래(T.5376 / 5360)

등록번호 [ ] [ ] 나이 [ ] 성별 [ ]

**Sudden**

- 갑자기 (Sudden)
- 자고 일어나니 (After awakening)
- 평소와 다르게 (As unusual)
- 그외 (Others)

[ ]

**Side**

- 한쪽 입 (One-side face)
- 한쪽 팔 (One-side arm)
- 한쪽 다리 (One-side leg)
- 그외 (Others)

[ ]

**Symptoms**

- 걸지 못해요 (Not able to walk)
- 말을 못해요 (Not able to speak)
- 잡히지 않아요 (Not able to grasp)
- 보이지 않아요 (Visual disturbance)
- 남의 살 같아요 (Abnormal sensation)
- 그외 (Others)

[ ]

응급실 도착시각 2016-08-24 17:19

증상 발생 시각 2016-08-24 --:--

시간 확실  시간 불확실

**FAST**

(Fast Thrombolysis code of the Ajou Ischemic Stroke Team)

적용(F9)

닫기(F3)
