# Supplementary material for: Stepwise stroke recognition through clinical information, vital signs, and initial labs (CIVIL): Electronic health record-based observational cohort study
Source: PubMed Central journal article supplement (PMC7159200; doi:10.1371/journal.pone.0231113), 2020-04-15

Supplementary figure 2. Flow diagram of 1,621 suspicious stroke patients.

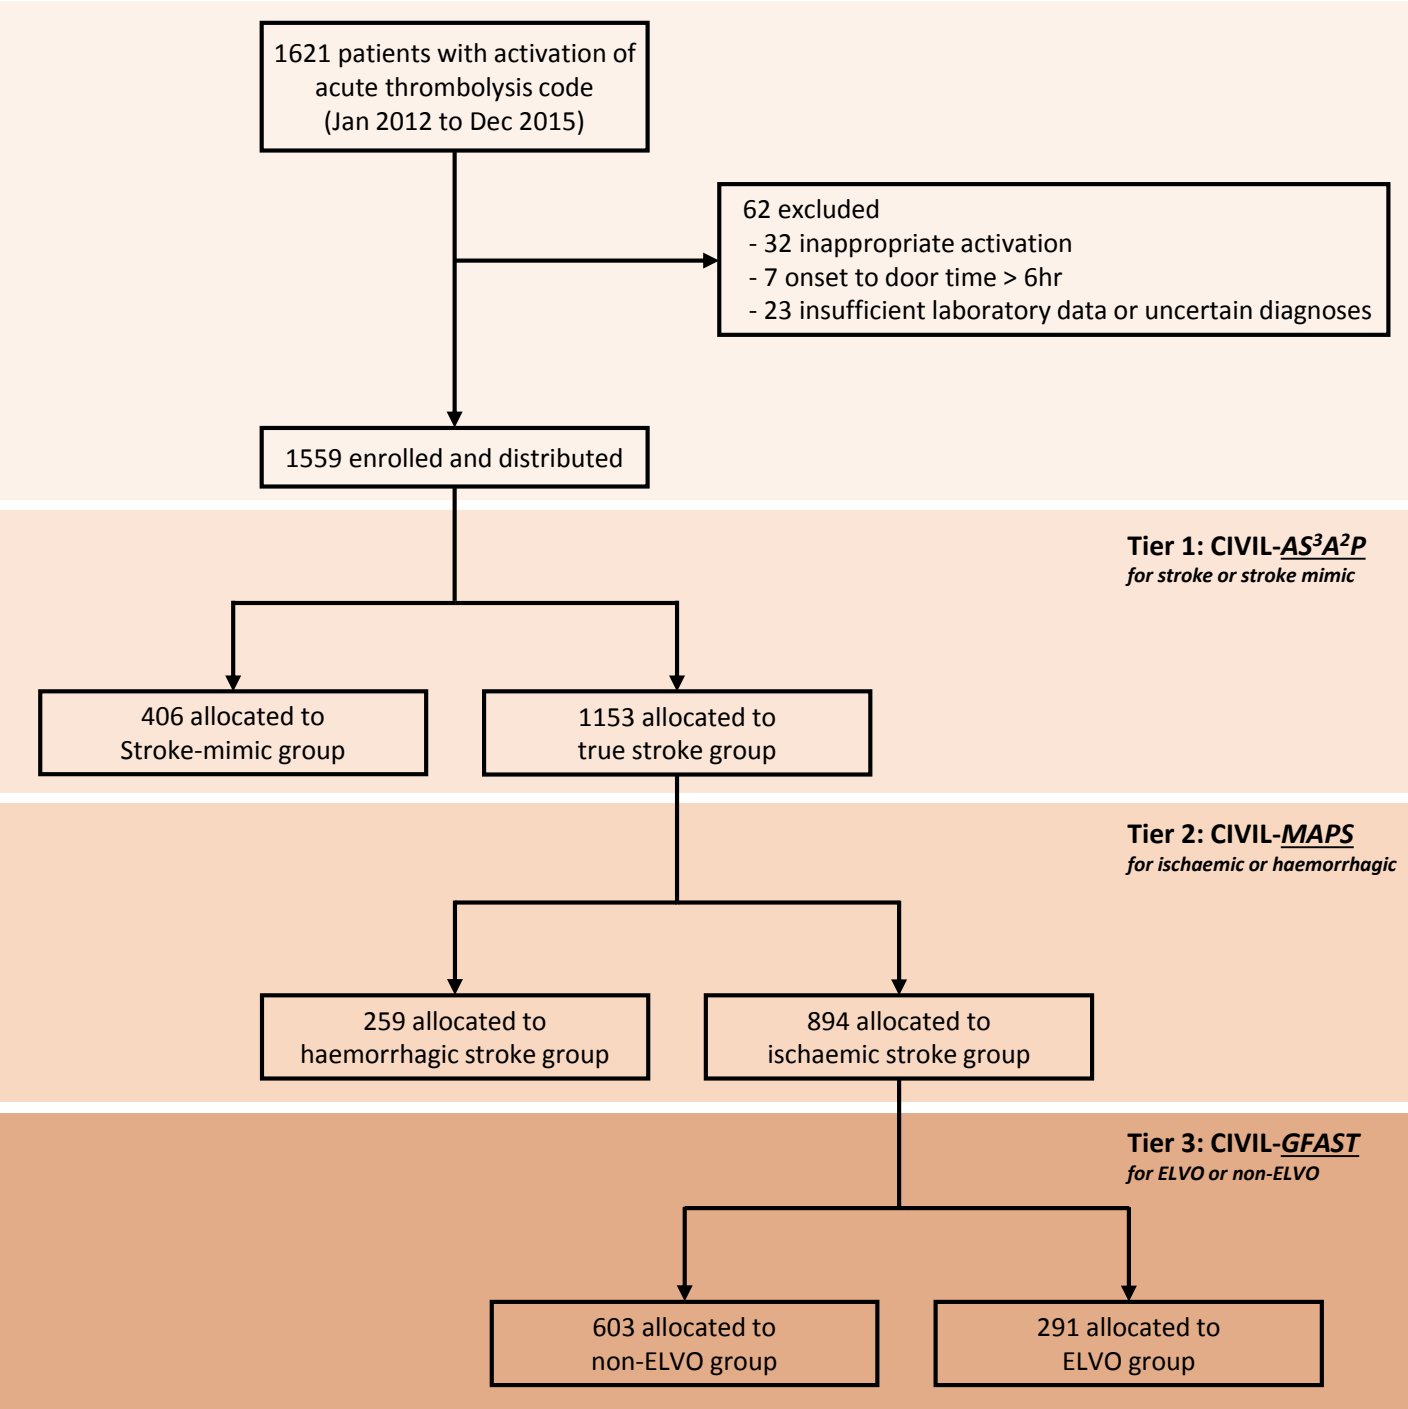

Supplement: pone.0231113.s004.pdf [file pone.0231113.s004.pdf]
