# Supplementary material for: Stepwise stroke recognition through clinical information, vital signs, and initial labs (CIVIL): Electronic health record-based observational cohort study
Source: PubMed Central journal article supplement (PMC7159200; doi:10.1371/journal.pone.0231113), 2020-04-15

**Supplementary figure 3. Receiver-operating characteristic (ROC) curve and corresponding area under the curve (AUC) statistics of the CIVIL scoring system.**

In step 1, performances of previous recognition systems (Cincinnati Prehospital Stroke Scale [CPSS], Los Angeles Prehospital Stroke Screen [LAPSS], and Recognition Of Stroke In the Emergency Room [ROSIER] system) were compared with the CIVIL system. In step 2 and 3, performances of the CIVIL system were presented.

**(A) Tier 1: CIVIL-AS<sup>3</sup>A<sup>2</sup>P**

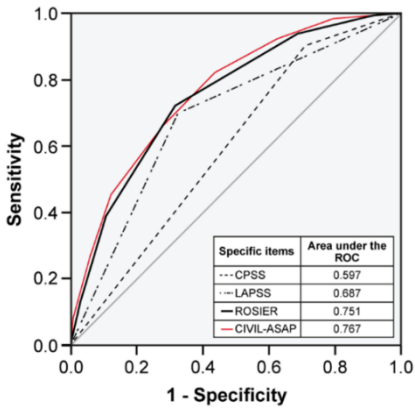

**(B) Tier 2: CIVIL-MAPS**

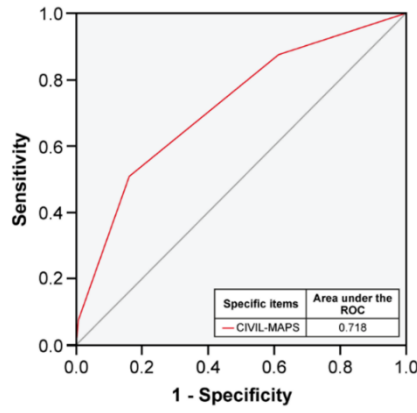

**(C) Tier 3: CIVIL-GFAST**

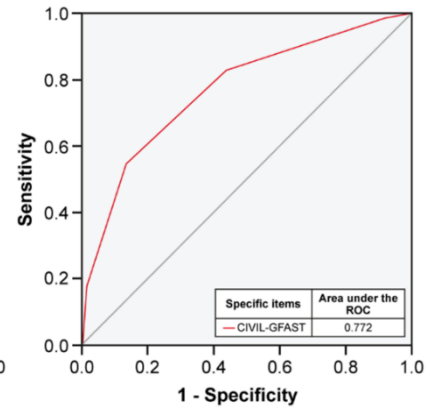

Supplement: pone.0231113.s005.pdf [file pone.0231113.s005.pdf]
